# Supplementary material for: Hiding in Plain Sight: Characterization of Aeromonas Species Isolated from a Recreational Estuary Reveals the Carriage and Putative Dissemination of Resistance Genes
Source: MDPI journal article supplement (doi:10.3390/antibiotics12010084), 2023-01-04
Supplement: s1 [file s1]

## Supplementary Materials

Communication

# Hiding in plain sight: characterization of *Aeromonas* species isolated from a recreational estuary reveals the carriage and putative dissemination of resistance genes

Anna Luiza Bauer Canellas<sup>1</sup>, Bruno Francesco Rodrigues de Oliveira<sup>2</sup>, Marinella Silva Laport<sup>1\*</sup>

<sup>1</sup> Laboratório de Bacteriologia Molecular e Marinha, Instituto de Microbiologia Paulo de Góes, Universidade Federal do Rio de Janeiro (UFRJ), Av. Carlos Chagas Filho, 373, Cidade Universitária, 21941-902 Rio de Janeiro, Brazil; annaluiza@micro.ufrj.br

<sup>2</sup> Departamento de Microbiologia e Parasitologia, Instituto Biomédico, Universidade Federal Fluminense, 24210-130 Niterói, RJ, Brazil; bfroliveira@id.uff.br

\* Correspondence: marinella@micro.ufrj.br

## Index

**Figure S1** Guanabara Bay sampling sites (green dots). Site 1 is located in the proximity of the Atlantic Ocean and is one of the least impacted sites. Site 7 is considered the intermediate site and site 34 is located in the inner part of the estuary, being considered one of the most ecologically impacted sites. Red markers indicate wastewater treatment plants.....2

**Table S1** Primer sequences, cycling conditions and amplicon sizes of the antimicrobial resistance genes and the class 1 integron-integrase gene investigated in this study.....3

**Table S2** Primer sequences, cycling conditions and amplicon sizes of the heavy metal resistance genes and the class 1 integron-integrase gene investigated in this study.....4

**References**.....5

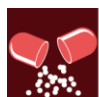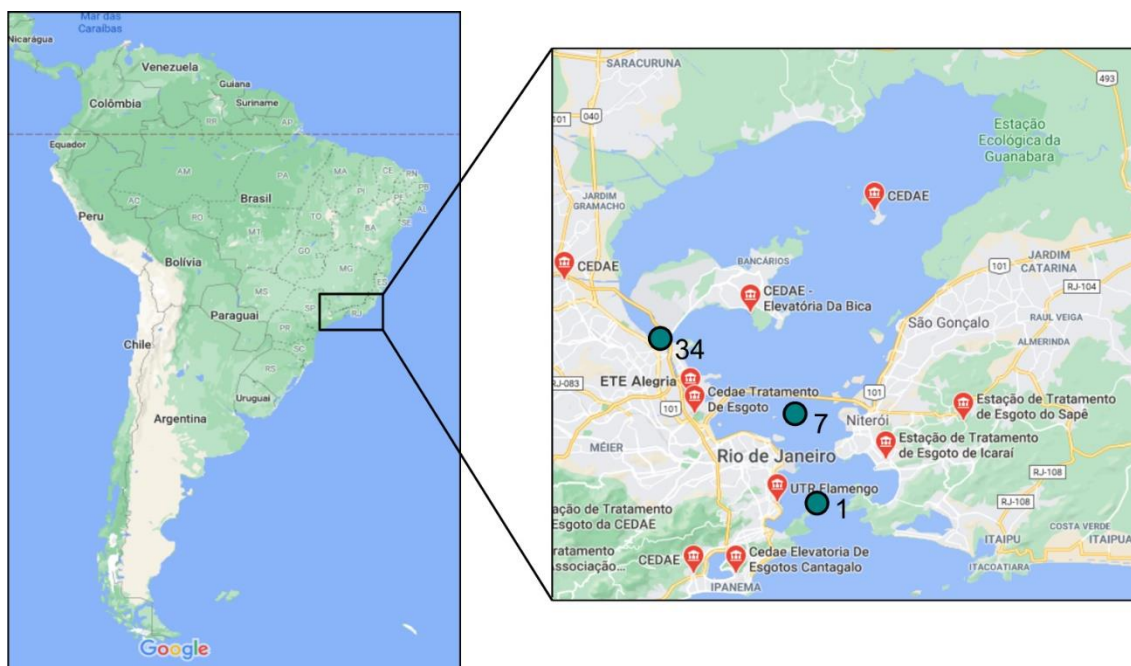

**Figure S1** Guanabara Bay sampling sites (green dots). Site 1 is located in the proximity of the Atlantic Ocean and is one of the least impacted sites. Site 7 is considered the intermediate site and site 34 is located in the inner part of the estuary, being considered one of the most ecologically impacted sites. Red markers indicate wastewater treatment plants.

**Table S1** Primer sequences, cycling conditions and amplicon sizes of the antimicrobial resistance genes investigated in this study.

| Resistance gene                | Primer    | Sequence                       | Cycling conditions                                                                         | Amplicon size (bp) | References |
|--------------------------------|-----------|--------------------------------|--------------------------------------------------------------------------------------------|--------------------|------------|
| <i>bla<sub>GES</sub></i>       | mGESF     | 5'-AGCAGCTCAGATCGGTGTTG-3'     | 95°C/10' + 30 cycles of 95°C/30",<br>54°C/30", 72°C/45" and final extension<br>of 72°C/10' | 750                | [1,2]      |
|                                | mGESR     | 5'-CCGTGCTCAGGATGAGTTG-3'      |                                                                                            |                    |            |
| <i>bla<sub>SHV</sub></i>       | mSHVF     | 5'-CTTGACCGCTGGGAAACGG-3'      |                                                                                            | 200                |            |
|                                | mSHVR     | 5'-AGCACGGAGCGGATCAACGG-3'     |                                                                                            |                    |            |
| <i>bla<sub>TEM</sub></i>       | mTEMF     | 5'-CCCTTATTCCTTTTGTGCGG-3'     |                                                                                            | 650                |            |
|                                | mTEMR     | 5'-AACCAGCCAGCCWGAAGG-3'       |                                                                                            |                    |            |
| <i>bla<sub>CTX-M-1,2</sub></i> | mCTX-1,2F | 5'-ATGTGCAGYACCAGTAA-3'        |                                                                                            | 512                |            |
|                                | mCTX-1,2R | 5'-CGCTGCCGGTTTTATCSCCC-3'     |                                                                                            |                    |            |
| <i>bla<sub>CTX-M-8</sub></i>   | mCTX-8F   | 5'-AACRCRCAGACGCTCTAC-3'       |                                                                                            | 333                |            |
|                                | mCTX-8R   | 5'-TCGAGCCGGAASGTGTAT-3'       |                                                                                            |                    |            |
| <i>bla<sub>CTX-M-14</sub></i>  | mCTX-14F  | 5'-GGTGACAAAGAGARTGCAACGGAT-3' |                                                                                            | 876                |            |
|                                | mCTX-14R  | 5'-TTACAGCCCTTCGGCGATGA-3'     |                                                                                            |                    |            |
| <i>bla<sub>KPC</sub></i>       | KPC1F     | 5'-GCTACACCTAGCTCCACCTTC-3'    | 94°C/5' + 30 cycles of 94°C/1';<br>61°C/30"; 72°C/1' and final extension<br>of 72°C/5'     | 950                | [3]        |
|                                | KPC1R     | 5'-TGGAGGGCCAATAGATGATT-3'     |                                                                                            |                    |            |
| <i>mcr-1</i>                   | mcr1-mtpF | 5'-ATGCCAGTTTCTTTTCGCGTG-3'    | 94°C/4' + 30 cycles of 94°C/5'';<br>59°C/20''                                              | 502                | [4]        |
|                                | mcr1-mtpR | 5'-TCGGCAAATTGCGCTTTTGGC-3'    |                                                                                            |                    |            |
| <i>mcr-2</i>                   | mcr2-mtpF | 5'-GATGGCGGTCTATCCTGTAT-3'     |                                                                                            | 379                |            |
|                                | mcr2-mtpR | 5'-AAGGCTGACACCCCATGTCAT-3'    |                                                                                            |                    |            |
| <i>mcr-3</i>                   | mcr3-mtpF | 5'-ACCAGTAAATCTGGTGGCGT-3'     |                                                                                            | 296                |            |
|                                | mcr3-mtpR | 5'-AGGACAACCTCGTCATAGCA-3'     |                                                                                            |                    |            |
| <i>mcr-4</i>                   | mcr4-mtpF | 5'-TTGCAGACGCCCATGGAATA-3'     |                                                                                            | 207                |            |
|                                | mcr4-mtpR | 5'-GCCGCATGAGCTAGTATCGT-3'     |                                                                                            |                    |            |
| <i>mcr-5</i>                   | mcr5-mtpF | 5'-GGACGCGACTCCCTAACTTC-3'     |                                                                                            | 608                |            |
|                                | mcr5-mtpR | 5'-ACAACCAGTACGAGAGCACG-3'     |                                                                                            |                    |            |

**Table S2** Primer sequences, cycling conditions and amplicon sizes of the heavy metal resistance genes and the class 1 integron-integrase gene investigated in this study.

| Resistance gene | Primer  | Sequence                       | Cycling conditions                                                                                | Amplicon size (bp) | References |
|-----------------|---------|--------------------------------|---------------------------------------------------------------------------------------------------|--------------------|------------|
| <i>merA</i>     | merA-F  | 5'-GTGCCGTCCAAGATCATGAT-3'     | 94°C/4 min + 30 ciclos de 94°C/1 min; 57°C/1 min; 72°C/1 min e extensão final a 72°C/8 min        | 933                | [5]        |
|                 | merA-R  | 5'-TAGCCYACRGTSGCACACTG-3'     |                                                                                                   |                    |            |
|                 | A1F     | 5'-ACCATCGGCGGCACCTGCGT-3'     | 95°C/5 min + 30 ciclos de 94°C/15 s; 63°C/30 s; 68°C/1 min e extensão final a 68°C/4 min          | 1226               | [6]        |
|                 | A5R     | 5'-ACCATCGTCAGGTAGGGGACCAA-3'  |                                                                                                   |                    |            |
| <i>merB</i>     | IA34F   | 5'-TTGGATCCATGAAGCTCGCCCCAT-3' | 95°C/ 5 min + 35 ciclos de 95°C/ 1 min; 61 °C/1 min; 72 °C/ 1 min e extensão final a 72°C/ 10 min | 639                | [7]        |
|                 | IA35R   | 5'-TTGGTACCCTAGATGACATGACAT-3' |                                                                                                   |                    |            |
| <i>cusB</i>     | czcB-I  | 5'-ATGAAAAAATCGCGCTT-3'        | 94°C/5 min + 35 ciclos de 94°C/30 s; 51°C/45 s; 72°C/1 min e extensão final a 72°C/10 min         | 1200               | [8]        |
|                 | czcB-II | 5'- ATGCGCATGGGTAGCACT-3'      |                                                                                                   |                    |            |
| <i>copA</i>     | cad1    | 5'-CAAAYTGYGCRGGHAARTTYGA-3'   | 94°C/5 min + 30 ciclos de 94°C/1 min; 60°C/1 min e 30 s; 72°C/2 min e extensão final a 72°C/5 min | 1058               | [9]        |
|                 | cad2    | 5'-AACTAATGCACAAGGACA-3'       |                                                                                                   |                    |            |
| <i>pbrA</i>     | pbrA-N  | 5'-ATGAGCGAATGTGGCTCGAAG-3'    | 96°C/5 min + 39 ciclos de 96°C/1 min; 58°C/1 min; 72°C/3 min e extensão final a 72°C/10 min       | 2400               | [10]       |
|                 | pbrA-C  | 5'-TCATCGACGCAACAGCCTCAA-3'    |                                                                                                   |                    |            |
| <i>intI1</i>    | INT1-F  | 5'-GGCTTCGTGATGCCTGCTT-3'      | 94°C/10 min + 35 ciclos de 98°C/30 s; 60°C/30 s; 72°C/30 s e extensão final a 72°C/10 min         | 146                | [11]       |
|                 | INT1-R  | 5'-CATTCCTGGCCGTGGTTCT-3'      |                                                                                                   |                    |            |

## References

- [1] Campana, E.H.; Xavier, D.E.; Petrolini, F.V.; Cordeiro-Moura, J.R.; Araujo, M.R.; Gales, A.C. Carbapenem-resistant and cephalosporin-susceptible: a worrisome phenotype among *Pseudomonas aeruginosa* clinical isolates in Brazil. *Braz. J. Infect. Dis.* **2017**, *21*(1), 57-62.
- [2] da Costa, W.F.; Giambiagi-deMarval, M.; Laport, M.S. *Shewanella* harboring antimicrobial and copper resistance genes in sea urchins (*Paracentrotus lividus*) from the Crozon peninsula (Brittany, France). *Infect. Genet. Evol.* **2020**, *85*, 104437.
- [3] Hossain, A.; Ferraro, M.J.; Pino, R.; Dew III, R.B.; Moland, E.S.; Lockhart, T.J.; Thomson, K.S.; Goering, R.V.; Hanson, N.D. Plasmid-mediated carbapenem-hydrolyzing enzyme KPC-2 in an *Enterobacter* sp. *Antimicrob. Agents Chemother.* **2004**, *48*(11), 4438-4440.
- [4] Lescat, M.; Poirel, L.; Nordmann, P. Rapid multiplex polymerase chain reaction for detection of *mcr-1* to *mcr-5* genes. *Diagn. Microbiol. Infect. Dis.* **2018**, *92*(4), 267-269.
- [5] Deredjian, A.; Colinon, C.; Brothier, E.; Favre-Bonté, S.; Cournoyer, B.; Nazaret, S. Antibiotic and metal resistance among hospital and outdoor strain of *Pseudomonas aeruginosa*. *Res. Microbiol.* **2011**, *162*, 689-700.
- [6] De, J.; Ramaiah, N.; Vardanyan, L. Detoxification of toxic heavy metals by marine bacteria highly resistant to mercury. *Mar. Biotechnol. (NY)*. **2008**, *10*, 471-477.
- [7] Murtaza, I.; Dutt, A.; Mushtaq, D.; Ali, A. Molecular cloning and genetic analysis of functional *merB* gene from Indian isolates of *Escherichia coli*. *Curr. Microbiol.* **2005**, *51*(5), 297-302.
- [8] Khan, Z.; Nisar, M.A.; Hussain, S.Z.; Arshad, M.N.; Rehman, A. Cadmium resistance mechanism in *Escherichia coli* P4 and its potential use to bioremediate environmental cadmium. *Appl. Microbiol. Biotechnol.* **2015**, *99*, 10745-10757.
- [9] Oger, C.; Bertheb, T.; Quilleta, L.; Barraya, S.; Chiffolleauc, J.F.; Petit, F. Estimation of the abundance of the cadmium resistance gene *cadA* in microbial communities in polluted estuary water. *Res. Microbiol.* **2001**, *152*, 671-678.

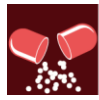

[10] Borremans, B.; Hobman, J.L.; Provoost, A.; Brown, N.L.; van-Der-Lelie, D. Cloning and functional analysis of the pbr lead resistance determinant of *Ralstonia metallidurans* CH34. *J. Bacteriol.* **2001**, *183*, 5651-5658.

[11] Luo, Y.I.; Mao, D.; Rysz, M.; Zhou, Q.; Zhang, H.; Xu, L.; JJ Alvarez, P. Trends in antibiotic resistance genes occurrence in the Haihe River, China. *Environ. Sci. Technol.* **2010**, *44*(19), 7220-7225.
